# Supplementary figures and images for: Enteropathogen antibody dynamics and force of infection among children in low-resource settings
Source: eLife journal article supplement (doi:10.7554/elife.45594), 2019-08-19

MFI change: — >4-fold increase, across cutoff — >4-fold decrease

— >4-fold increase, above cutoff — <4-fold change

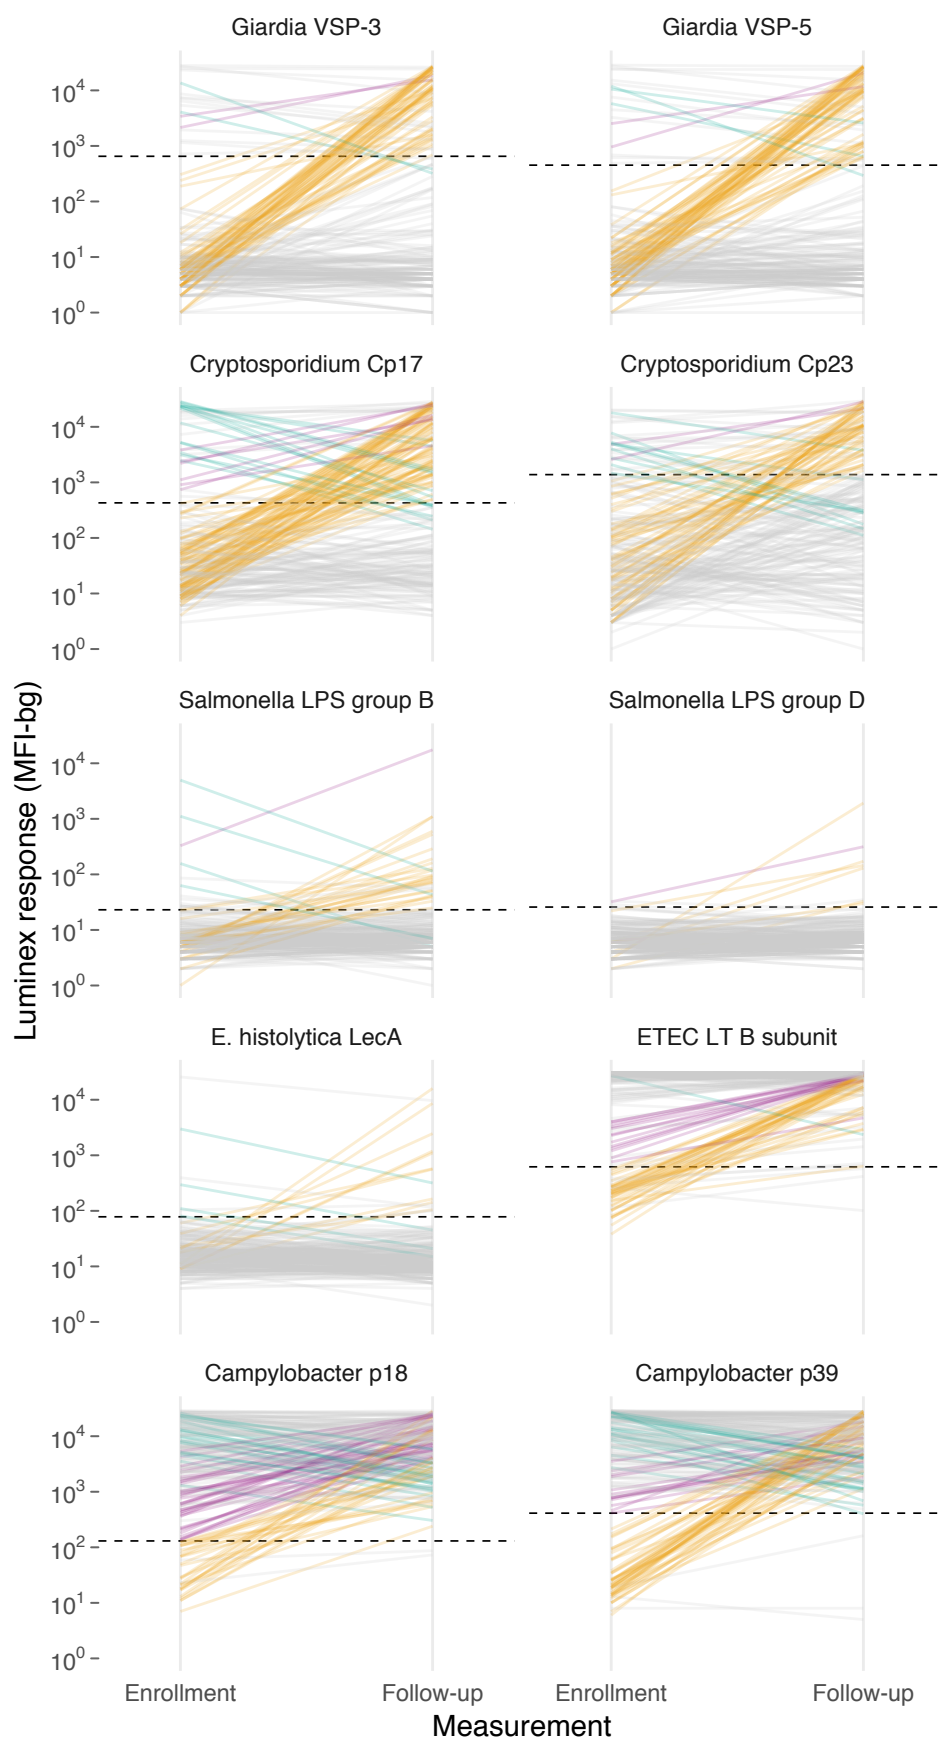

Supplement: supp [file elife-45594-supp-v1.zip]

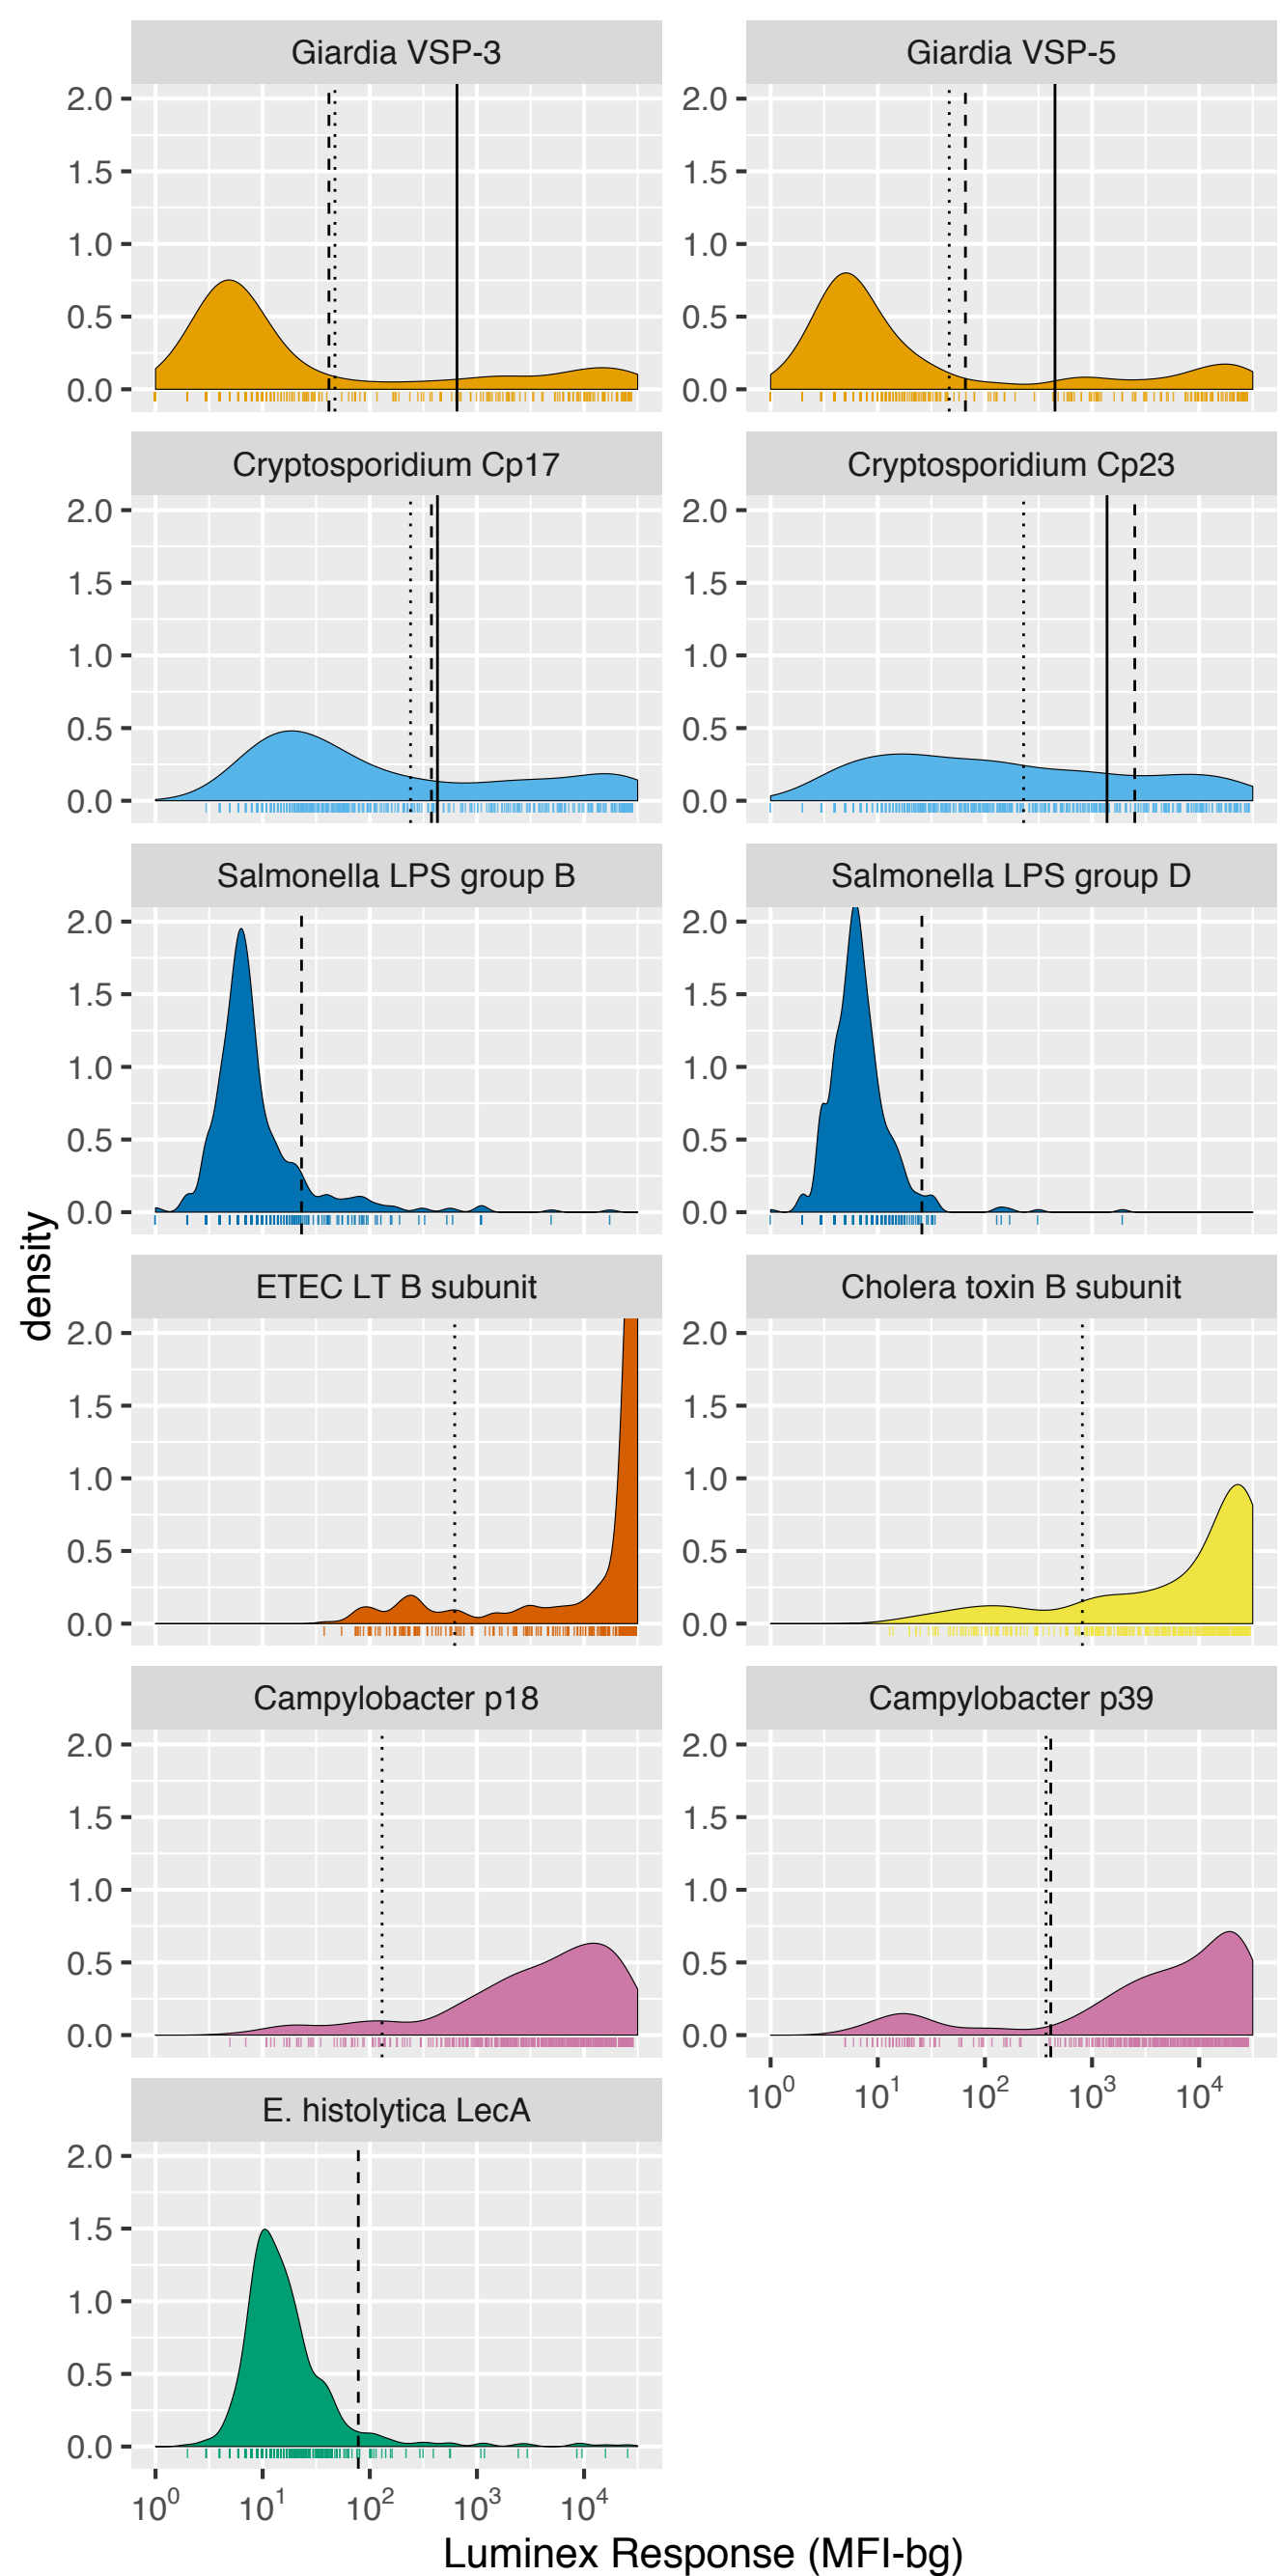

Supplement: supp [file elife-45594-supp-v1.zip]

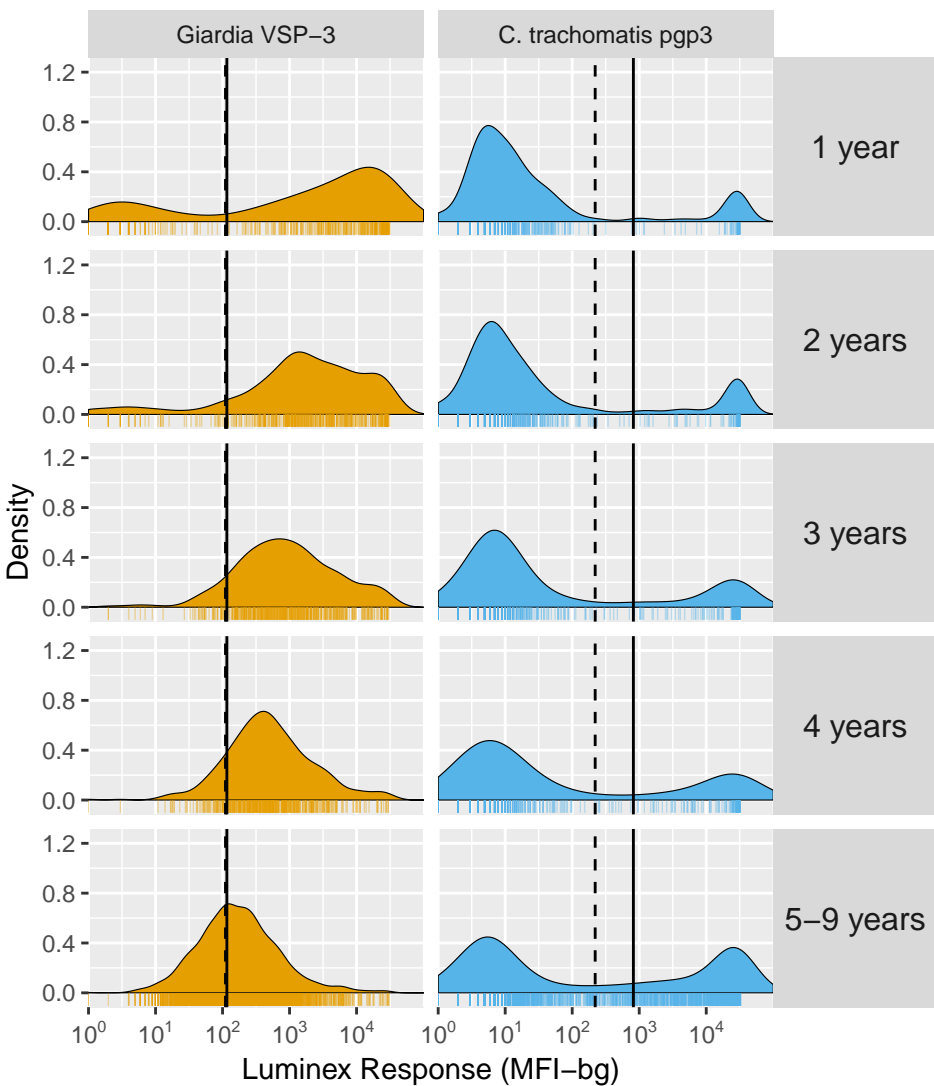

Supplement: supp [file elife-45594-supp-v1.zip]

MFI change: ● >4-fold increase, across cutoff ● >4-fold decrease ● >4-fold increase, above cutoff ● <4-fold change

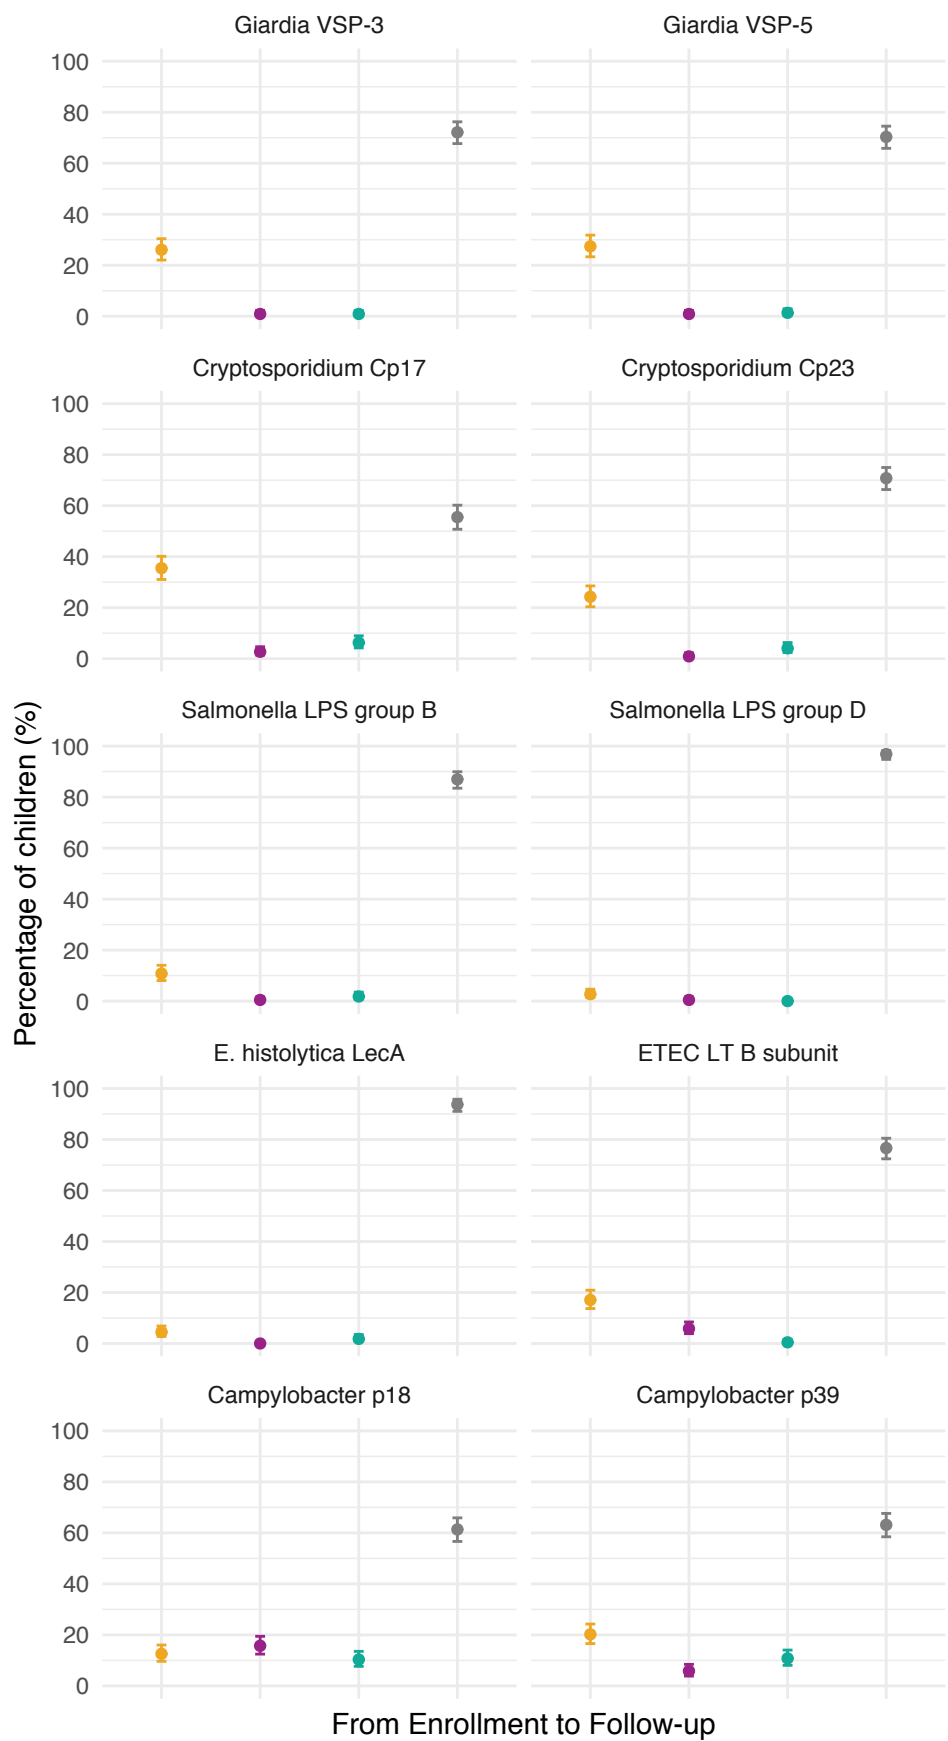

Supplement: supp [file elife-45594-supp-v1.zip]

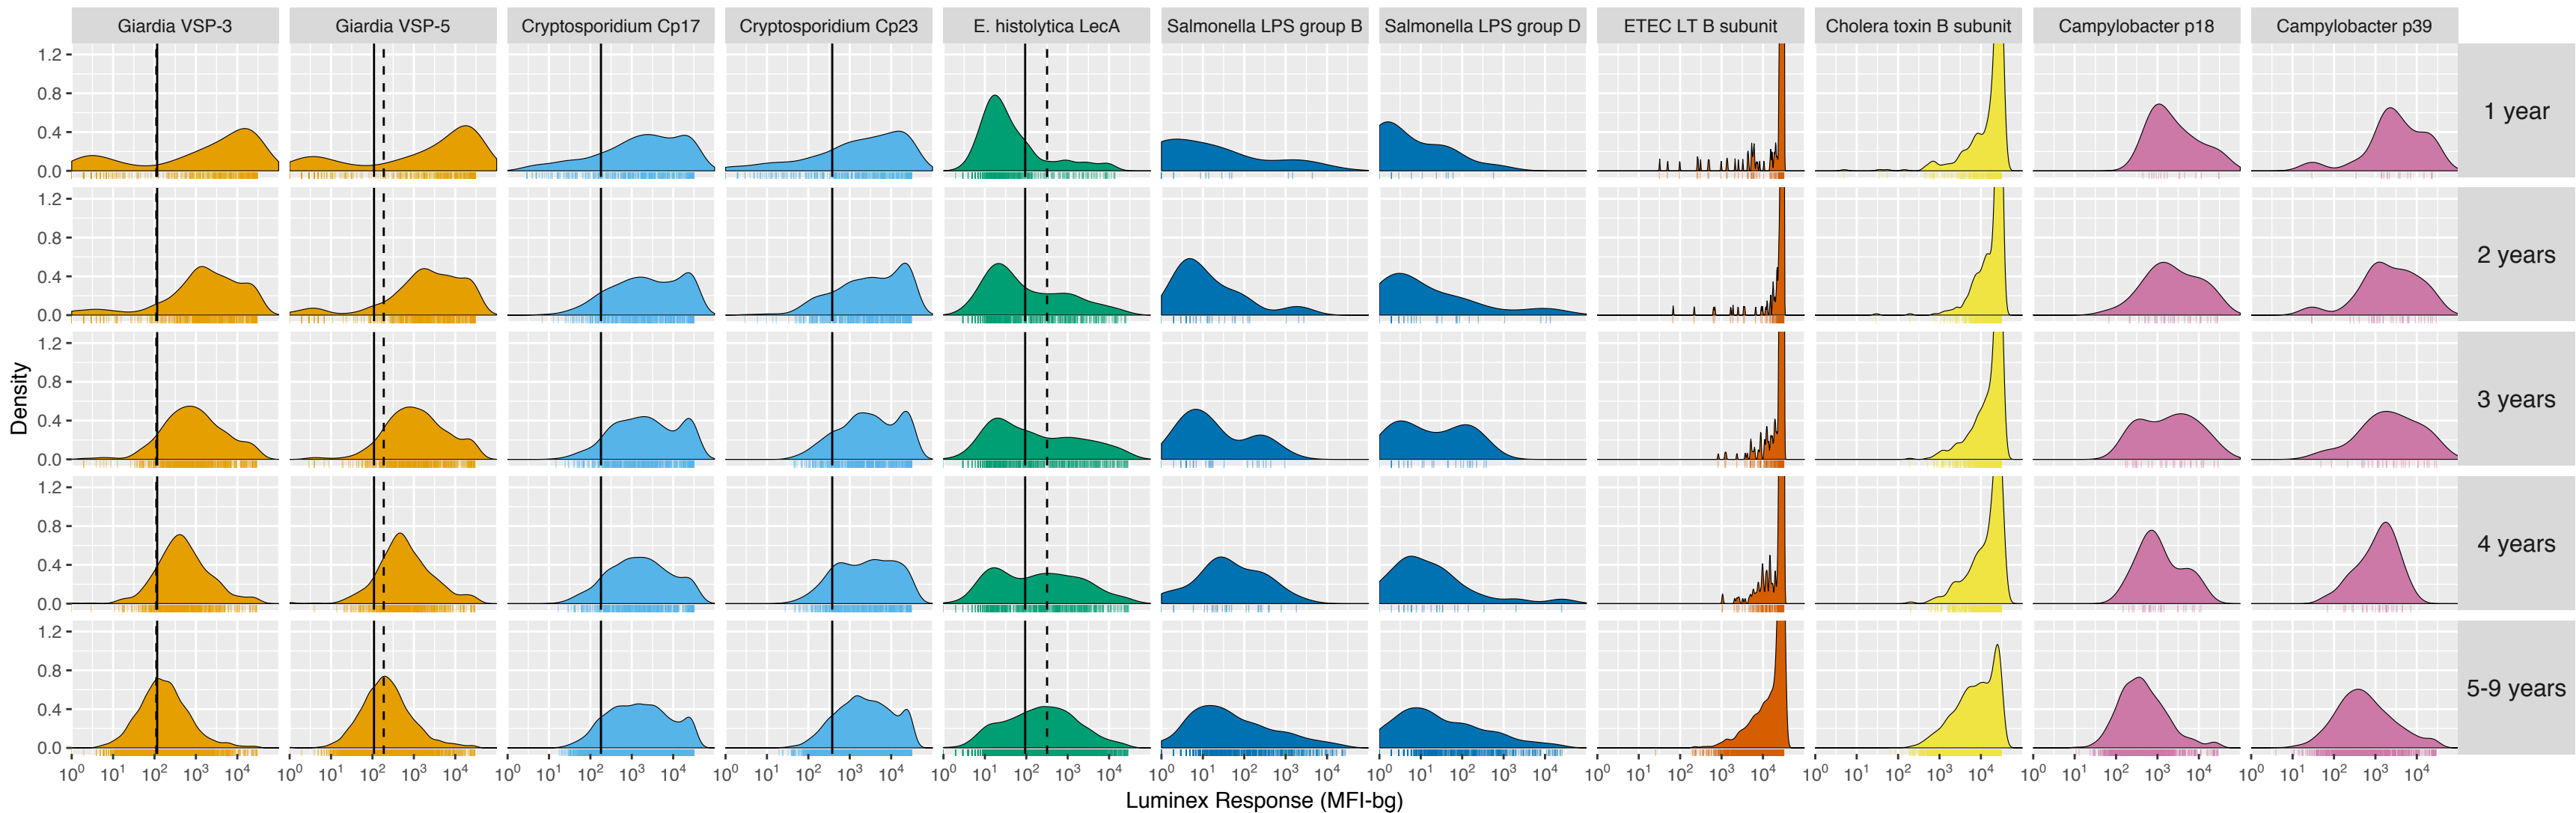

Supplement: supp [file elife-45594-supp-v1.zip]

MFI change:

- >4-fold increase, across cutoff
- >4-fold decrease
- >4-fold increase, above cutoff
- <4-fold change

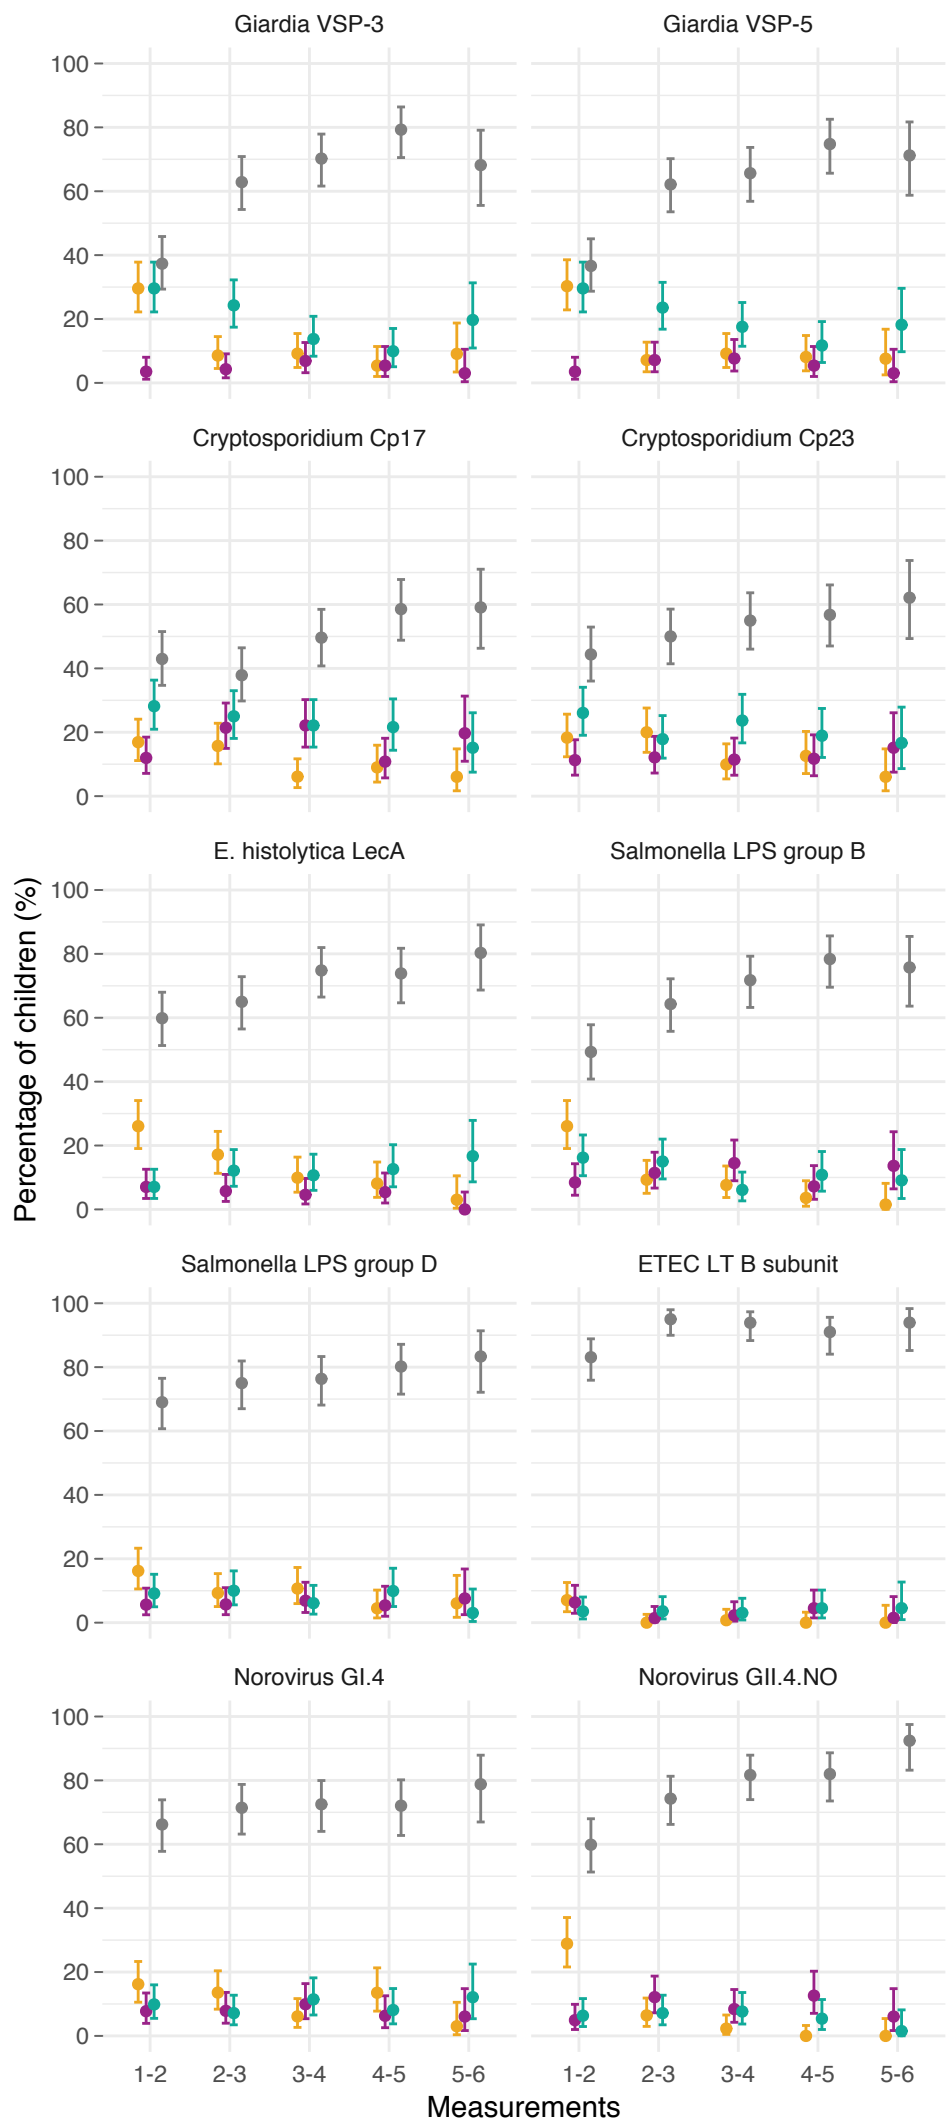

Supplement: supp [file elife-45594-supp-v1.zip]

**A**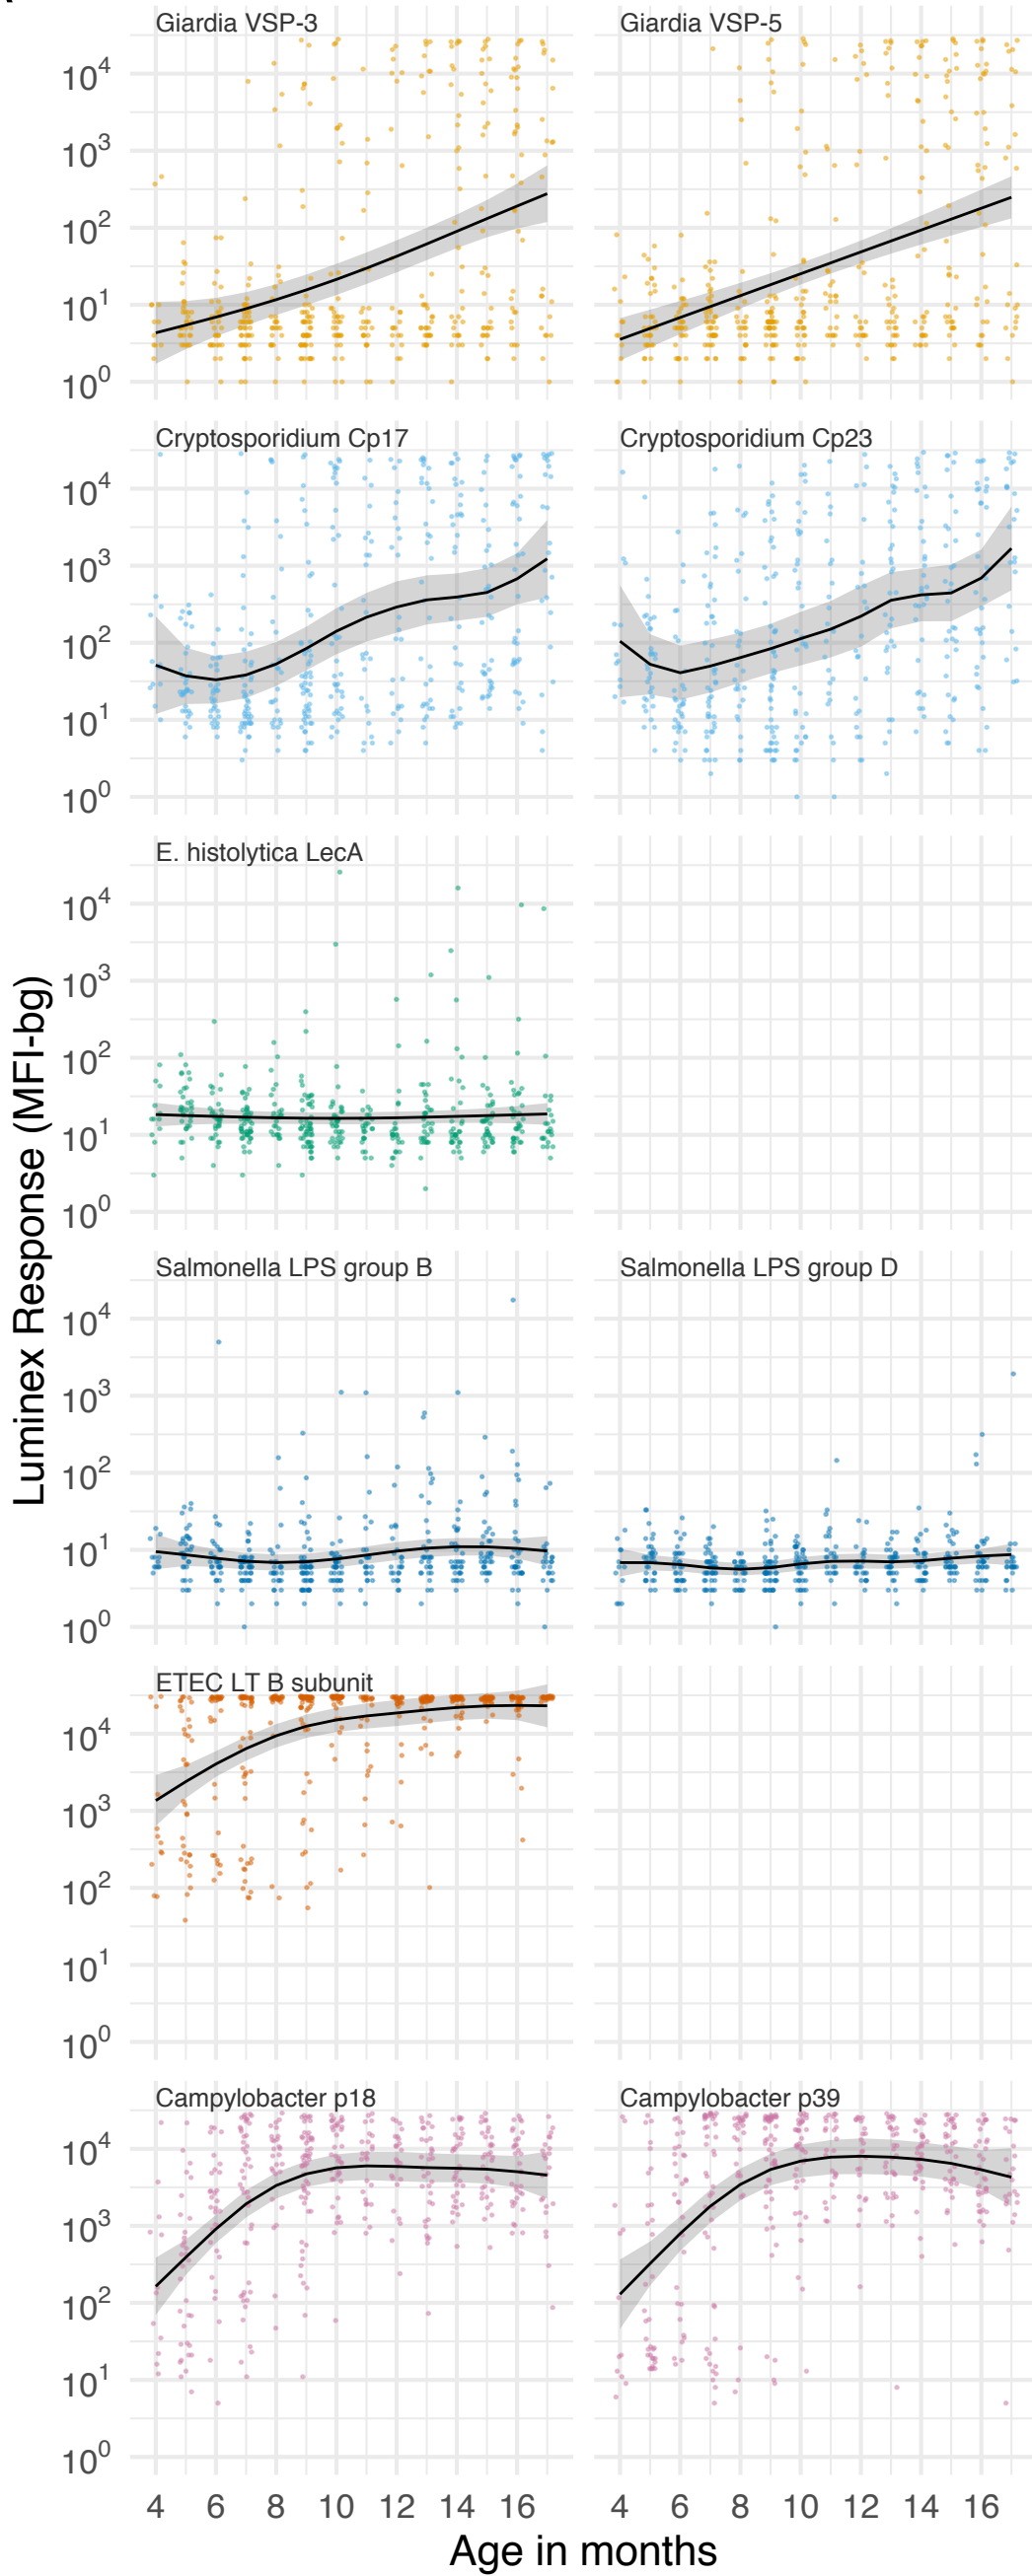**B**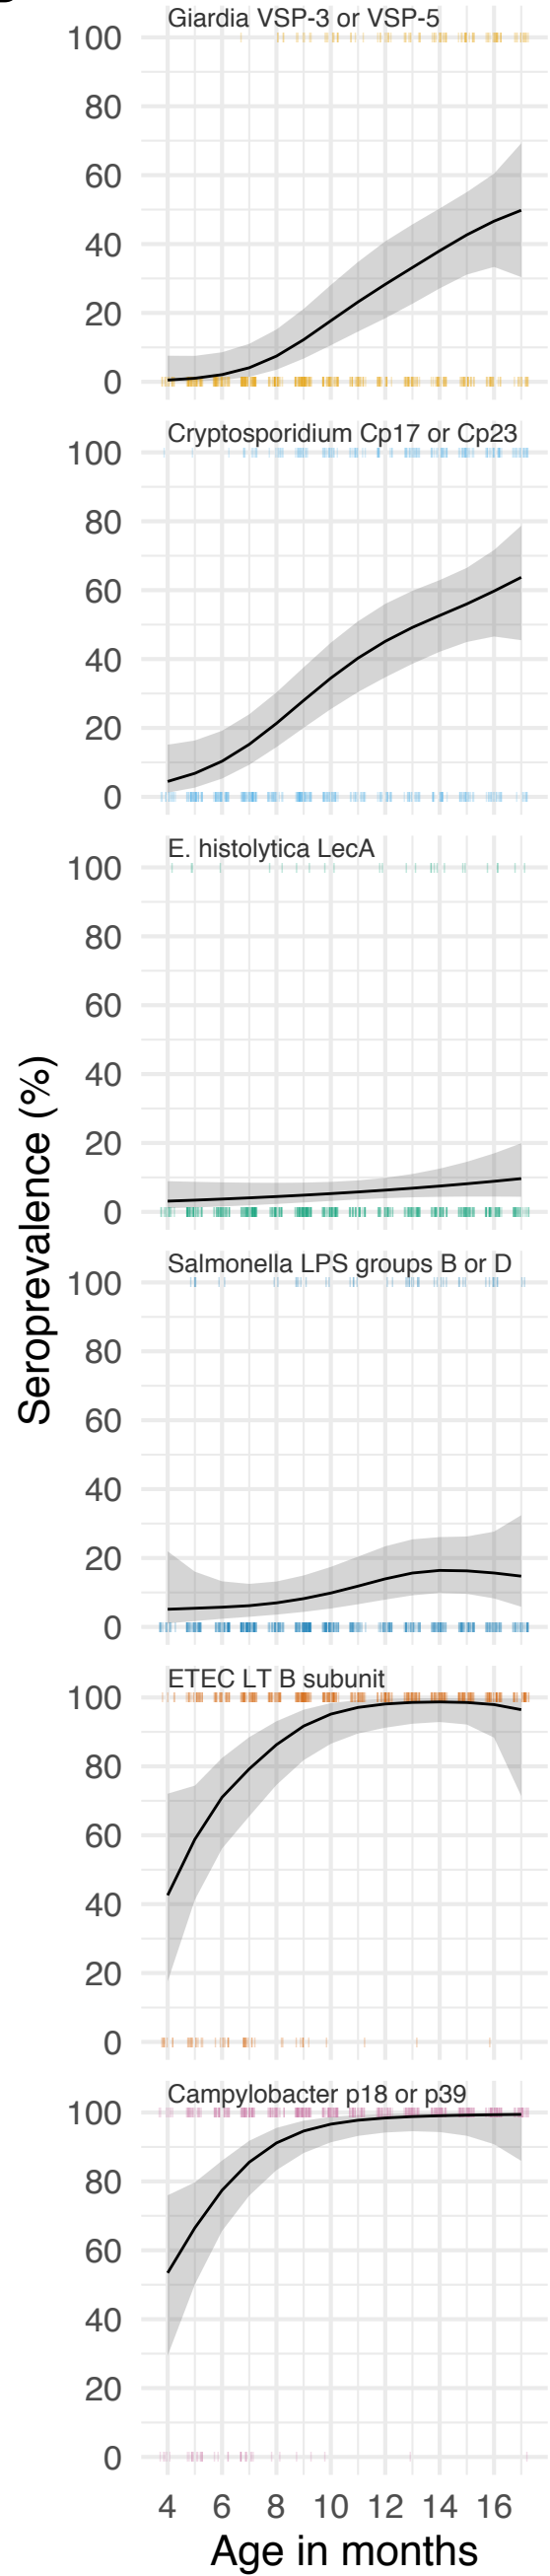

Supplement: supp [file elife-45594-supp-v1.zip]

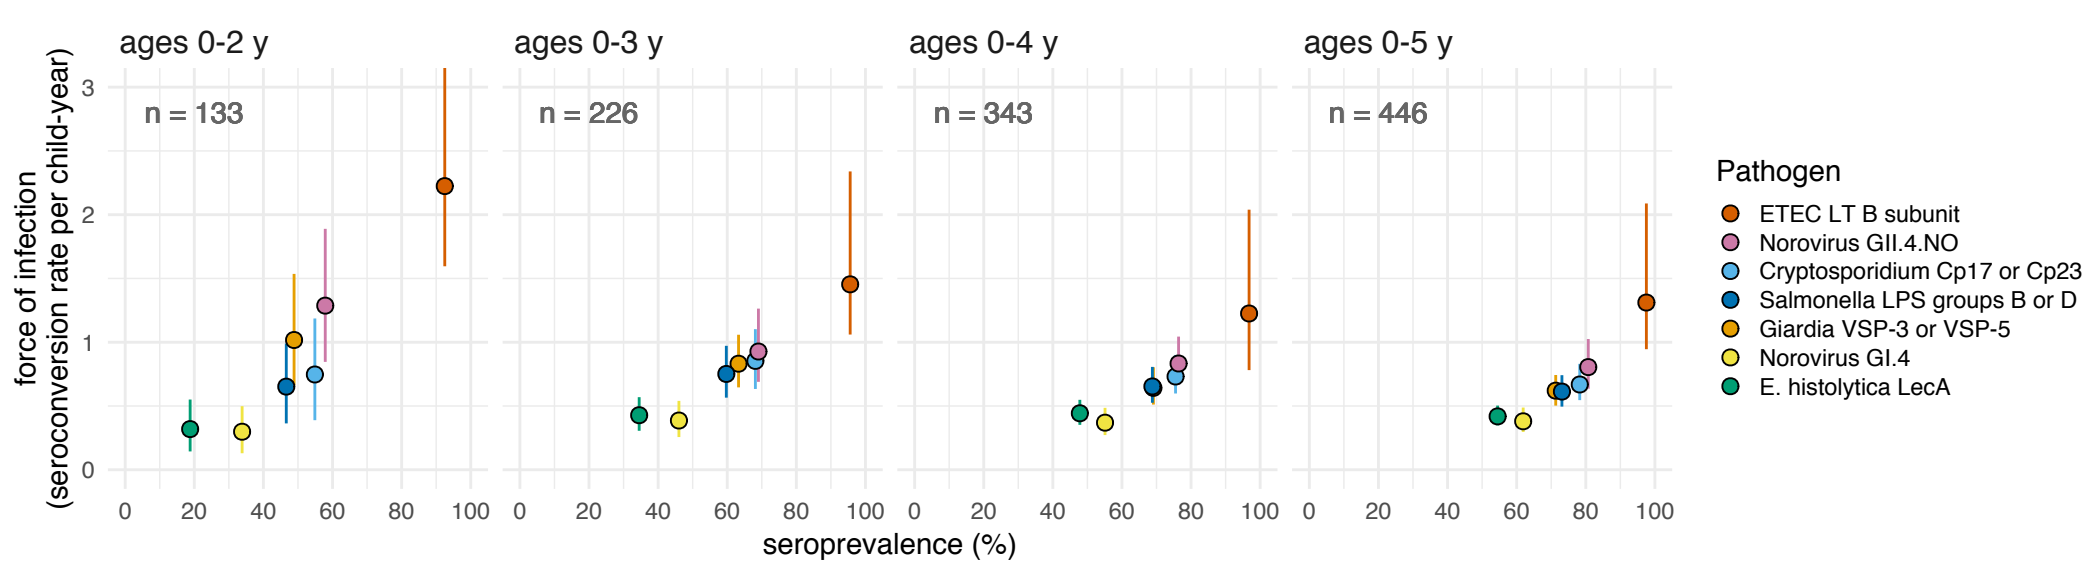

Supplement: supp [file elife-45594-supp-v1.zip]

A

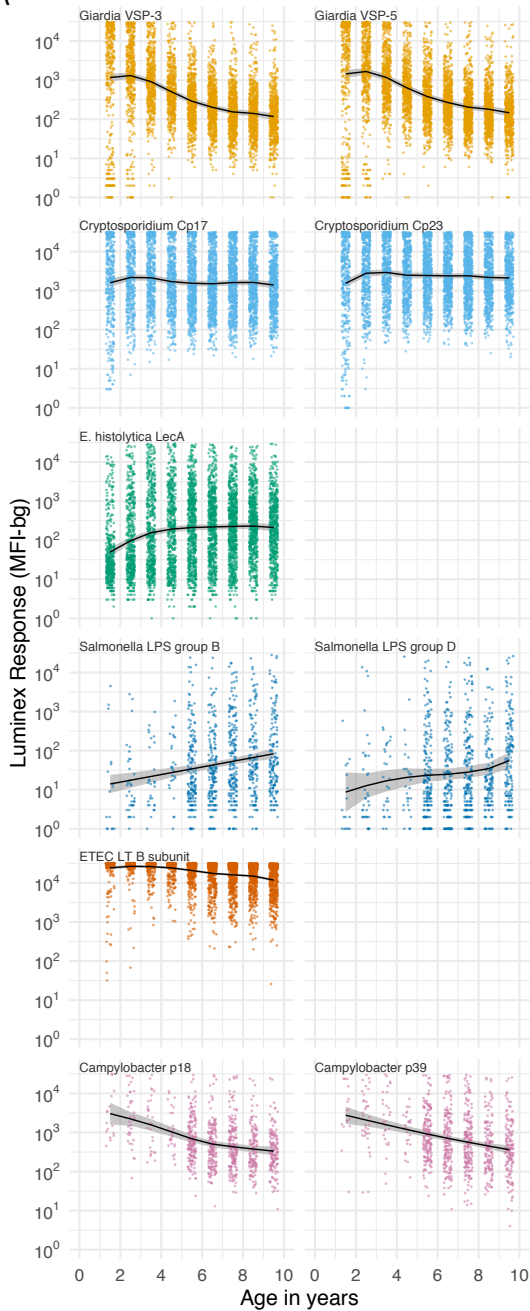

B

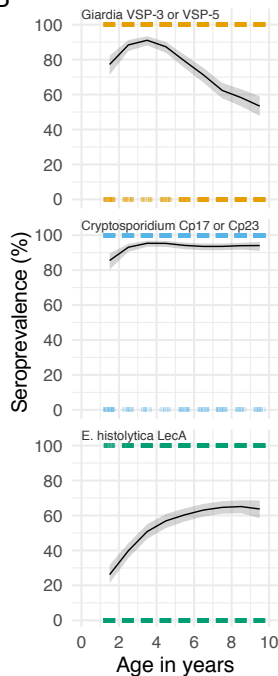

Supplement: supp [file elife-45594-supp-v1.zip]
